# Supplementary material for: A phosphorus-doped carbon material derived from a sodium alginate/phosphoric acid hydrogel as an efficient catalyst for catalytic oxidation of furfural to maleic acid
Source: Royal Society of Chemistry journal article supplement (doi:10.1039/d4cy00570h), 2024-01-01
Supplement: d4cy00570h1.pdf [file d4cy00570h1.pdf]

## Supporting Information

### A phosphorus-doped carbon material derived from sodium alginate/ phosphoric acid hydrogel as an efficient catalyst for catalytic oxidation of furfural to maleic acid

Lutong Jiao,<sup>a,b</sup> Chenyu Wang,<sup>a</sup> Yuhui Wu,<sup>a</sup> Han Meng,<sup>a</sup> Peijun Ji<sup>\*a</sup>

<sup>a</sup> College of Chemical Engineering, Beijing University of Chemical Technology, Beijing 100029, PR China.

<sup>b</sup> School of Chemistry and Chemical Engineering, Tarim University, Alar, Xinjiang 843300, PR China.

**Table S1** Comparison of the activity of various metal-free heterogeneous catalysts for the oxidation of furfural to maleic acid.

| Catalyst                        | Reaction conditions <sup>a</sup> | Conv. (%) | Yield <sub>M</sub> <sub>A</sub> (%) | TOF <sup>b</sup> (×10 <sup>-3</sup> ) | Reference |
|---------------------------------|----------------------------------|-----------|-------------------------------------|---------------------------------------|-----------|
| Ambelyst-70                     | 1.8 g / 477 mM / 50 °C / 24 h    | 100       | 20                                  | 0.08                                  | S1        |
| Ambelyst-15                     | 50 mg / 294 mM / 80 °C / 24 h    | >99       | 11                                  | 0.09                                  | S2        |
| SO <sub>3</sub> H/GO-HT         | 50 mg / 278 mM / 70 °C / 24 h    | 79.8      | 1.2                                 | 0.05                                  | S3        |
| Graphite                        | 50 mg / 100 mM / 80 °C / 5 h     | 99        | 17                                  | 0.68                                  | S4        |
| KIT-6                           | 60 mg / 2000 mM / 70 °C / 1 h    | 46.8      | 2.8                                 | 0.47                                  | S5        |
| P-C-600                         | 150 mg / 333 mM / 60 °C / 10 h   | 100       | 76.3                                | 1.27                                  | S6        |
| NC-900                          | 50 mg / 100 mM / 80 °C / 5 h     | 100       | 61                                  | 2.44                                  | S4        |
| g-C <sub>3</sub> N <sub>4</sub> | 50 mg / 333 mM / 100 °C / 3 h    | >99       | 16.8                                | 3.36                                  | S7        |
| PC-700                          | 210 mg / 1000 mM / 80 °C / 5 h   | 100       | 74.8                                | 7.12                                  | This work |

<sup>a</sup> These data represent catalyst dosage, furfural concentration, reaction temperature and reaction time.

<sup>b</sup> Turnover frequency (TOF) =  $\frac{\text{mole of MA produced}}{\text{dosage of the catalyst} \times \text{reaction time}}$  (mol · g<sup>-1</sup> · h<sup>-1</sup>).

Ambelyst-70 and Ambelyst-15: solid acid catalyst (sulfonated polystyrene-based ion-exchange resin). SO<sub>3</sub>H/GO-HT: SO<sub>3</sub>H-modified graphite oxide reduced at high temperature. KIT-6: well-ordered mesoporous silica. PC-600: phytic acid-derived phosphorus-doped carbon catalyst. NC-900: ZIF-8-derived nitrogen-doped porous carbon. g-C<sub>3</sub>N<sub>4</sub>: graphitic carbon nitride.

\* Corresponding author. E-mail address: jipj@buct.edu.cn

**Table S2** The phosphorus content and specific surface areas of various P-doped carbon materials.

| Catalyst       | Precursors                                           | Total P (wt %) <sup>a</sup> | Surface areas (m <sup>2</sup> /g) | Reference |
|----------------|------------------------------------------------------|-----------------------------|-----------------------------------|-----------|
| PC-700         | Soluble starch and H <sub>3</sub> PO <sub>4</sub>    | 2.4                         | 1612.9                            | S8        |
| P-C-600        | Phytic acid                                          | 14.1                        | 1038.6                            | S6        |
| PCF            | sodium polyacrylate and hexametaphosphate            | 0.53                        | 697.6                             | S9        |
| P-PCN-800      | Glucose and P <sub>2</sub> O <sub>5</sub>            | 2.55                        | 1555.5                            | S10       |
| PGc            | Phytic acid                                          | 11                          | 1200                              | S11       |
| PMCS           | Glucose and phytic acid                              | 6.05 <sup>b</sup>           | 574.7                             | S12       |
| MCel-PC-4(800) | Cellulose and H <sub>3</sub> PO <sub>4</sub>         | 6.8                         | 641                               | S13       |
| P/N-0.75       | Resorcinol, F127 and H <sub>3</sub> PO <sub>4</sub>  | 6.18                        | 94                                | S14       |
| PC600          | α-Cellulose and H <sub>3</sub> PO <sub>4</sub>       | 8.8 <sup>c</sup>            | 1491                              | S15       |
| PG             | Triphenylphosphine                                   | 4.07 <sup>d</sup>           | 1414                              | S16       |
| RGO-P          | Graphene Oxide and NaH <sub>2</sub> PO <sub>2</sub>  | 5.93                        | -                                 | S17       |
| PG800S         | Graphene and H <sub>3</sub> PO <sub>4</sub>          | 6.89                        | 100                               | S18       |
| CFs-P15        | Polyacrylonitrile and H <sub>3</sub> PO <sub>4</sub> | 1.4 <sup>d</sup>            | 50.6                              | S19       |
| PFRC500        | Furfural residue and H <sub>3</sub> PO <sub>4</sub>  | 7.74                        | 1769.4                            | S20       |
| POMC           | Acetylene and triphenylphosphine                     | 0.13                        | 403.5                             | S21       |
| WAPC-4/P       | Walnut shell and red phosphorus                      | 4.88                        | 2518.4                            | S22       |
| P-C-800        | Phytic acid                                          | 9.19                        | 1464.6                            | S23       |
| HPCSCMs        | Cotton stalks and H <sub>3</sub> PO <sub>4</sub>     | 7.7 <sup>b</sup>            | 3463.1                            | S24       |
| PBCs           | Wood powder and H <sub>3</sub> PO <sub>4</sub>       | 9.83                        | 1038.1-                           | S25       |
| 0.075-PC       | Sucrose and H <sub>3</sub> PO <sub>4</sub>           | 4.26                        | 802                               | S26       |
| PMC            | Sucrose and H <sub>3</sub> PO <sub>4</sub>           | 9.6                         | 830                               | S27       |
| ACPH800        | Orange peel and H <sub>3</sub> PO <sub>4</sub>       | 0.82 <sup>b</sup>           | 1204                              | S28       |

<sup>a</sup> The data from XPS (wt%). <sup>b</sup> The data from EDS (wt%). <sup>c</sup> The data from X-ray fluorescence spectroscopic (XRF) (wt%). <sup>d</sup> The data from ICP-OES (wt%).

PC-700: starch-derived phosphorus-doped carbon materials. P-C-600: phytic acid-derived phosphorus-doped carbon materials. PCF: P-doped carbon foam. P-PCN-800: P-doped porous carbon nanosheets. PGc: P-doped graphitic carbon. PMCS: phosphorus-doped macroporous carbon spheres. MCel-PC-4(800): microcrystalline cellulose derived P-doped carbons. P/N-0.75: Phosphorylated mesoporous carbons. PC-600: cellulose-phosphoric supramolecular collosol derived P-doped carbon materials. PG: phosphorus-doped nanomesh graphene. RGO-P: amorphous phosphorus-doped graphene. PG800S: P-doped carbon materials. CFs-P15: Phosphorus-doped hard carbon nanofibers. PFRC500: P-doped furfural residue-based carbon materials. POMC: phosphorus-doped cubic ordered mesoporous carbon. WAPC-4/P: walnut shell-derived P-doped porous carbon. P-C-800: P-doped carbon. HPCSCMs: hierarchical P-doped cotton stalk carbon materials. PBCs: P-doped biochars. 0.075-PC: P-doped microporous carbon (0.075 is the phosphorus/carbon molar ratio). PMC: P-doped mesoporous carbon. ACPH800: P-doped activated carbon.

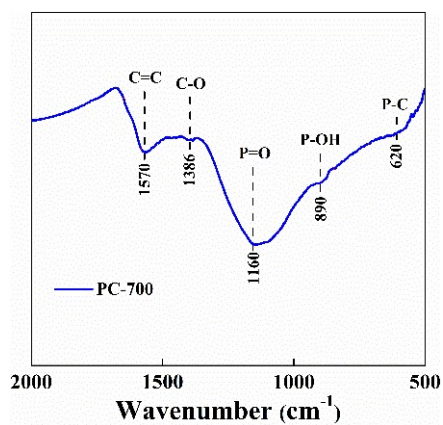

Fig. S1 FT-IR spectrum of PC-700.

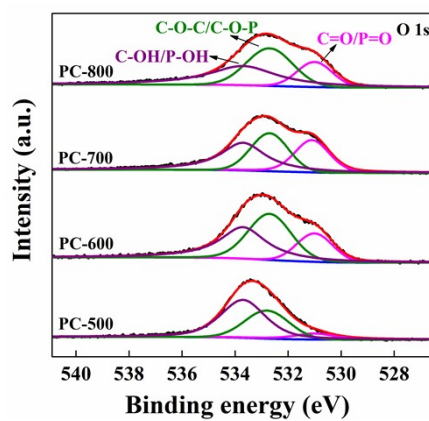

Fig. S2 The deconvolution of the O 1s peak of PC-Ts.

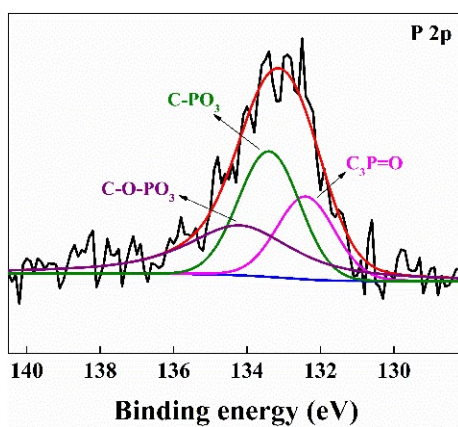

Fig. S3 The deconvolution of the P 2p peak of P&SA-700.

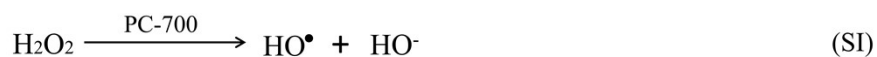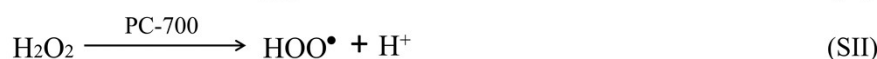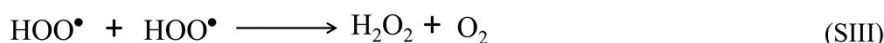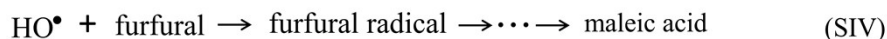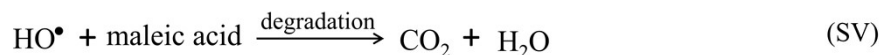

**Scheme S1** The decomposition of  $\text{H}_2\text{O}_2$  over PC-700.

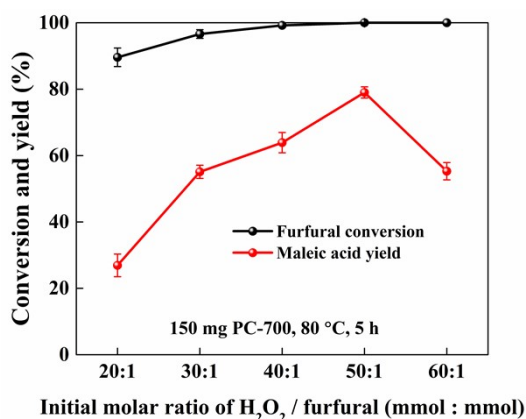

**Fig. S4** The effect of initial molar ratio of  $\text{H}_2\text{O}_2$  to furfural on the conversion of furfural and the yield of maleic acid.

Reaction conditions: 150 mg PC-700, 1 mmol furfural, 5 mL  $\text{H}_2\text{O}$ , 80 °C, 5 h, stirring rate 500 rpm.

### Catalyst characterization

Scanning electron microscope (SEM, HITACHI SU8020, acceleration voltage: 15 kV) was used to observe the morphology of samples. X-ray photoelectron spectroscopy (XPS) spectra were measured using a Thermo VF ESCALAB 250Xi spectrometer. The Al  $K\alpha$  X-ray was used as the excitation source at the pressure of  $2 \times 10^{-8}$  Pa for the XPS measurement. Powder X-ray diffraction (XRD) was measured with a Rigaku-Ultima IV instrument with  $2\theta$  range from  $5^\circ$  to  $90^\circ$  and the scanning speed was  $10^\circ/\text{min}$ . Infrared spectra were measured with a Nicolet iS10 FT-IR spectrometer at a nominal resolution of  $4 \text{ cm}^{-1}$ . The Raman spectra were recorded with a Renishaw InVia Reflex Raman microscope with an excitation wavelength of 785 nm. The electron paramagnetic resonance (EPR) spectra were characterized using a Bruker EMX-plus spectrometer. And the 5,5-dimethyl-1-pyrroline N-oxide (DMPO) was used as spin-trapping agent. Typically, the aqueous solution of DMPO was added

to the samples, and then the mixture was transferred into an EPR tube for EPR experiments. The N<sub>2</sub> adsorption measurements were measured with a Micromeritics ASAP 2460 instrument at 77 K. The sample was degassed at 120 °C for 12 h before the measurement. Using the Brunauer–Emmett–Teller (BET) method, the surface area was calculated based on the adsorption isotherm data points and the pore size distribution was determined.

## References

- S1 N. Alonso-Fagundez, I. Agirrezabal-Telleria, P. L. Arias, J. L. G. Fierro, R. Mariscal and M. L. Granados, *RSC Adv.*, 2014, **4**, 54960-54972.
- S2 H. Choudhary, S. Nishimura and K. Ebitani, *Appl. Catal., A*, 2013, **458**, 55-62.
- S3 W. Z. Zhu, F. R. Tao, S. W. Chen, M. Li, Y. X. Yang and G. Q. Lv, *ACS Sustainable Chem. Eng.*, 2019, **7**, 296-305.
- S4 C. V. Nguyen, J. R. Boo, C. H. Liu, T. Ahamad, S. M. Alshehri, B. M. Matsagar and K. C. W. Wu, *Catal. Sci. Technol.*, 2020, **10**, 1498-1506.
- S5 M. Rezaei, A. N. Chermahini, H. A. Dabbagh, M. Saraji and A. Shahvar, *Journal of Environmental Chemical Engineering*, 2019, **7**, 102855.
- S6 H. F. Zhang, S. L. Wang, H. X. Zhang, J. H. Clark and F. H. Cao, *Green Chem.*, 2021, **23**, 1370-1381.
- S7 T. Yang, W. Z. Li, Q. C. Liu, M. X. Su, T. W. Zhang and J. R. Ma, *BioResources*, 2019, **14**, 5025-5044.
- S8 X. Hu, M. Fan, Y. Zhu, Q. Zhu, Q. Song and Z. Dong, *Green Chem.*, 2019, **21**, 5274-5283.
- S9 Y. Zou, D. Guo, B. Yang, L. Zhou, P. Lin, J. Wang, X. a. Chen and S. Wang, *ACS Appl. Mater. Interfaces*, 2021, **13**, 50093-50100.
- S10 G. Zhong, S. Lei, X. Hu, Y. Ji, Y. Liu, J. Yuan, J. Li, H. Zhan and Z. Wen, *ACS Appl. Mater. Interfaces*, 2021, **13**, 29511-29521.
- S11 M. A. Patel, F. Luo, M. R. Khoshi, E. Rabie, Q. Zhang, C. R. Flach, R. Mendelsohn, E. Garfunkel, M. Szostak and H. He, *ACS Nano*, 2016, **10**, 2305-2315.
- S12 C. X. Li, M. M. Yang, R. H. Liu, F. F. Zhao, H. Huang, Y. Liu and Z. H. Kang,

- RSC Adv.*, 2014, **4**, 22419-22424.
- S13 Z. Long, L. Sun, W. Zhu, G. Chen, X. Wang and W. Sun, *Chem. Commun.*, 2018, **54**, 8991-8994.
- S14 A. Villa, M. Schiavoni, P. F. Fulvio, S. M. Mahurin, S. Dai, R. T. Mayes, G. M. Veith and L. Prati, *J. Energy Chem.*, 2013, **22**, 305-311.
- S15 J. Meng, Y. Z. Liu, Q. Q. Xia, S. Liu, Z. H. Tong, W. S. Chen, S. X. Liu, J. Li, S. Dou and H. P. Yu, *Small Methods*, 2021, **5**, 2100964.
- S16 F. Yang, X. Fan, C. Wang, W. Yang, L. Hou, X. Xu, A. Feng, S. Dong, K. Chen, Y. Wang and Y. Li, *Carbon*, 2017, **121**, 443-451.
- S17 K. C. Poon, W. Y. Wan, H. B. Su and H. Sato, *ACS Appl. Energy Mater.*, 2021, **4**, 5388-5391.
- S18 Z. Bi, L. Huo, Q. Kong, F. Li, J. Chen, A. Ahmad, X. Wei, L. Xie and C.-M. Chen, *ACS Appl. Mater. Interfaces*, 2019, **11**, 11421-11430.
- S19 F. Wu, R. Q. Dong, Y. Bai, Y. Li, G. H. Chen, Z. H. Wang and C. Wu, *ACS Appl. Mater. Interfaces*, 2018, **10**, 21335-21342.
- S20 X. Zhou, X. Liu, F. Qi, H. Shi, Y. Zhang and P. Ma, *Sep. Purif. Technol.*, 2022, **292**, 120954.
- S21 K. Gunasekaran Govindarasu, R. Venkatesan, M. Eswaran and P. Arumugam, *Adv. Powder Technol.*, 2022, **33**, 103439.
- S22 H. Sun, C. Liu, D. Guo, S. Liang, W. Xie, S. Liu and Z. Li, *RSC Adv.*, 2022, **12**, 24724-24733.
- S23 H. Zhang, S. Wang, H. Zhang, L. Cui and F. Cao, *Fuel*, 2022, **324**, 124024.
- S24 Y. Wei, W. Cheng, Y. Huang, Z. Liu, R. Sheng, X. Wang, D. Jia and X. Tang, *Langmuir*, 2022, **38**, 11610-11620.
- S25 M. Zhou, Y. Xu, G. Luo, Q. Zhang, L. Du, X. Cui and Z. Li, *Chem. Eng. J.*, 2022, **432**, 134440.
- S26 R. Wu, Y. P. Hang, J. H. Li and A. L. Bao, *Surf. Interface Anal.*, 2022, **54**, 881-891.
- S27 G. R. Paixão, N. G. Camparotto, G. d. V. Brião, R. d. L. Oliveira, J. C. Colmenares, P. Prediger and M. G. A. Vieira, *Chem. Eng. Res. Des.*, 2022, **187**,

225-239.

S28 K. M. S. Khalil, W. A. Elhamdy and A. A. Elsamahy, *Colloid and Surface A*,  
2022, **641**, 128553.
